# Supplementary material for: Construction of a DNA Fingerprinting of Improved Varieties of Slash Pines in China Based on 51K Liquid-Phased Probes
Source: Preprints.org preprint supplement (doi:10.20944/preprints202409.1853.v1), 2024-09-24
Supplement: Supplementary file 1 [file supplementary]

## Sheet: Supplementary Figure.1
Supplementary Figure 1. The technical route of this study.

## Sheet: Supplementary Table 1
Table 1． Basic information on improved varieties of 29 slash pines
Variety Number	Progeny Family Number	Variety Number	Progeny Family Number
PEE1	2	PEE16	II-101
PEE2	3	PEE17	0-609
PEE3	4	PEE18	4-26
PEE4	0-1027	PEE19	4-24
PEE5	0-508	PEE20	8-19
PEE6	0-464	PEE21	0-508
PEE7	4-23	PEE22	II-33
PEE8	I-101	PEE23	8-18
PEE9	Ⅳ-60	PEE24	0-1027
PEE10	2-77	PEE25	6-22
PEE11	2-77	PEE26	V-12
PEE12	7-77	PEE27	S14
PEE13	4-24	PEE28	SS2
PEE14	0-374	PEE29	S11
PEE15	0-1077

## Sheet: Supplementary Table 2
Basic Imformation of Samples in Validation Population
Sample ID	Family	Improved or Unknown variety
105-3	0-1027	Improved variety
108-4	0-508	Improved variety
111-3	7-77	Improved variety
117-1	0-1077	Improved variety
117-2	0-1077	Improved variety
117-3	0-1077	Improved variety
117-4	0-1077	Improved variety
117-6	0-1077	Improved variety
12-1	7-77	Improved variety
121-2	0-609	Improved variety
121-5	0-609	Improved variety
123-3	0-464	Improved variety
123-4	0-464	Improved variety
126-2	6-22	Improved variety
126-3	6-22	Improved variety
126-5	6-22	Improved variety
126-6	6-22	Improved variety
133-1	7-77	Improved variety
133-4	7-77	Improved variety
133-5	7-77	Improved variety
133-6	7-77	Improved variety
137-1	0-609	Improved variety
137-3	0-609	Improved variety
137-5	0-609	Improved variety
138-3	0-508	Improved variety
138-5	0-508	Improved variety
138-6	0-508	Improved variety
140-1	6-22	Improved variety
140-2	6-22	Improved variety
140-3	6-22	Improved variety
140-6	6-22	Improved variety
14-1	0-464	Improved variety
144-1	0-1027	Improved variety
144-2	0-1027	Improved variety
144-4	0-1027	Improved variety
144-5	0-1027	Improved variety
144-6	0-1027	Improved variety
149-1	0-464	Improved variety
149-3	0-464	Improved variety
149-4	0-464	Improved variety
149-5	0-464	Improved variety
149-6	0-464	Improved variety
156-1	0-1077	Improved variety
156-5	0-1077	Improved variety
156-6	0-1077	Improved variety
171-1	6-22	Improved variety
171-3	6-22	Improved variety
173-3	0-1027	Improved variety
175-1	7-77	Improved variety
175-3	7-77	Improved variety
175-4	7-77	Improved variety
178-1	0-1077	Improved variety
178-3	0-1077	Improved variety
178-6	0-1077	Improved variety
18-1	0-1027	Improved variety
184-1	0-609	Improved variety
184-2	0-609	Improved variety
184-6	0-609	Improved variety
188-4	0-508	Improved variety
190-3	0-464	Improved variety
190-4	0-464	Improved variety
30-3	6-22	Improved variety
40-3	0-1077	Improved variety
40-6	0-1077	Improved variety
41-3	7-77	Improved variety
47-1	0-1027	Improved variety
49-2	6-22	Improved variety
6-2	0-1077	Improved variety
6-4	0-1077	Improved variety
6-6	0-1077	Improved variety
71-5	6-22	Improved variety
74-1	7-77	Improved variety
74-2	7-77	Improved variety
81-6	0-1027	Improved variety
91-2	0-508	Improved variety
96-2	0-1077	Improved variety
96-3	0-1077	Improved variety
96-4	0-1077	Improved variety
100-1	Ⅱ-101	Unknown variety
100-2	Ⅱ-101	Unknown variety
100-3	Ⅱ-101	Unknown variety
100-4	Ⅱ-101	Unknown variety
100-5	Ⅱ-101	Unknown variety
100-6	Ⅱ-101	Unknown variety
10-1	0-187	Unknown variety
101-1	3-1	Unknown variety
101-2	3-1	Unknown variety
101-4	3-1	Unknown variety
101-6	3-1	Unknown variety
102-5	0-636	Unknown variety
102-6	0-636	Unknown variety
103-1	CK3	Unknown variety
103-2	CK3	Unknown variety
103-3	CK3	Unknown variety
104-1	Ⅱ-90	Unknown variety
104-2	Ⅱ-90	Unknown variety
104-4	Ⅱ-90	Unknown variety
104-5	Ⅱ-90	Unknown variety
104-6	Ⅱ-90	Unknown variety
107-1	8-47	Unknown variety
109-4	0-373	Unknown variety
109-5	0-373	Unknown variety
1-1	8-131	Unknown variety
11-2	CK3	Unknown variety
112-5	Ⅱ-102	Unknown variety
113-3	0-510	Unknown variety
113-5	0-510	Unknown variety
113-6	0-510	Unknown variety
114-2	Ⅵ-433	Unknown variety
115-1	10-105	Unknown variety
115-3	10-105	Unknown variety
115-4	10-105	Unknown variety
115-5	10-105	Unknown variety
116-5	CK1	Unknown variety
118-1	10-73	Unknown variety
118-3	10-73	Unknown variety
118-5	10-73	Unknown variety
118-6	10-73	Unknown variety
119-2	CK2	Unknown variety
119-3	CK2	Unknown variety
1-2	8-131	Unknown variety
120-4	CK4	Unknown variety
120-6	CK4	Unknown variety
122-1	11-6	Unknown variety
122-2	11-6	Unknown variety
122-3	11-6	Unknown variety
122-5	11-6	Unknown variety
122-6	11-6	Unknown variety
124-3	11-26	Unknown variety
124-5	11-26	Unknown variety
127-1	0-53	Unknown variety
127-4	0-53	Unknown variety
128-6	0-187	Unknown variety
129-1	8-131	Unknown variety
129-5	8-131	Unknown variety
129-6	8-131	Unknown variety
1-3	8-131	Unknown variety
130-2	Ⅱ-325	Unknown variety
130-3	Ⅱ-325	Unknown variety
130-5	Ⅱ-325	Unknown variety
131-5	Ⅱ-296	Unknown variety
13-2	10-73	Unknown variety
134-1	8-131	Unknown variety
134-2	8-131	Unknown variety
134-3	8-131	Unknown variety
134-5	8-131	Unknown variety
135-1	0-636	Unknown variety
135-2	0-636	Unknown variety
135-4	0-636	Unknown variety
135-6	0-636	Unknown variety
136-1	Ⅱ-101	Unknown variety
136-3	Ⅱ-101	Unknown variety
136-5	Ⅱ-101	Unknown variety
136-6	Ⅱ-101	Unknown variety
139-5	CK2	Unknown variety
1-4	8-131	Unknown variety
141-2	Ⅱ-102	Unknown variety
141-6	Ⅱ-102	Unknown variety
142-1	0-510	Unknown variety
142-3	0-510	Unknown variety
142-5	0-510	Unknown variety
142-6	0-510	Unknown variety
143-1	7-258	Unknown variety
143-2	7-258	Unknown variety
143-3	7-258	Unknown variety
143-5	7-258	Unknown variety
143-6	7-258	Unknown variety
145-1	0-1339	Unknown variety
145-2	0-1339	Unknown variety
145-3	0-1339	Unknown variety
145-5	0-1339	Unknown variety
145-6	0-1339	Unknown variety
146-1	Ⅱ-296	Unknown variety
146-4	Ⅱ-296	Unknown variety
146-5	Ⅱ-296	Unknown variety
146-6	Ⅱ-296	Unknown variety
147-3	CK3	Unknown variety
147-4	CK3	Unknown variety
147-5	CK3	Unknown variety
147-6	CK3	Unknown variety
148-1	CK1	Unknown variety
148-2	CK1	Unknown variety
148-3	CK1	Unknown variety
148-4	CK1	Unknown variety
148-5	CK1	Unknown variety
1-5	8-131	Unknown variety
150-1	0-373	Unknown variety
150-2	0-373	Unknown variety
150-4	0-373	Unknown variety
151-1	0-187	Unknown variety
151-3	0-187	Unknown variety
151-5	0-187	Unknown variety
152-1	8-47	Unknown variety
152-2	8-47	Unknown variety
152-3	8-47	Unknown variety
152-4	8-47	Unknown variety
152-5	8-47	Unknown variety
152-6	8-47	Unknown variety
153-1	8-49	Unknown variety
153-2	8-49	Unknown variety
153-3	8-49	Unknown variety
153-5	8-49	Unknown variety
153-6	8-49	Unknown variety
154-1	10-73	Unknown variety
154-2	10-73	Unknown variety
154-6	10-73	Unknown variety
155-3	0-53	Unknown variety
155-6	0-53	Unknown variety
157-5	Ⅱ-325	Unknown variety
157-6	Ⅱ-325	Unknown variety
158-1	Ⅱ-90	Unknown variety
158-2	Ⅱ-90	Unknown variety
158-4	Ⅱ-90	Unknown variety
159-1	8-126	Unknown variety
159-2	8-126	Unknown variety
159-3	8-126	Unknown variety
159-4	8-126	Unknown variety
159-5	8-126	Unknown variety
1-6	8-131	Unknown variety
160-1	11-6	Unknown variety
160-2	11-6	Unknown variety
160-3	11-6	Unknown variety
160-4	11-6	Unknown variety
160-5	11-6	Unknown variety
160-6	11-6	Unknown variety
16-1	0-53	Unknown variety
161-3	11-26	Unknown variety
161-5	11-26	Unknown variety
162-1	Ⅵ-433	Unknown variety
162-2	Ⅵ-433	Unknown variety
162-3	Ⅵ-433	Unknown variety
162-4	Ⅵ-433	Unknown variety
162-5	Ⅵ-433	Unknown variety
162-6	Ⅵ-433	Unknown variety
16-3	0-53	Unknown variety
163-2	0-105	Unknown variety
163-3	0-105	Unknown variety
163-6	0-105	Unknown variety
164-1	3-1	Unknown variety
164-2	3-1	Unknown variety
164-3	3-1	Unknown variety
164-4	3-1	Unknown variety
164-5	3-1	Unknown variety
164-6	3-1	Unknown variety
165-1	CK4	Unknown variety
165-2	CK4	Unknown variety
165-3	CK4	Unknown variety
165-4	CK4	Unknown variety
165-5	CK4	Unknown variety
165-6	CK4	Unknown variety
166-2	10-105	Unknown variety
168-2	Ⅱ-325	Unknown variety
168-3	Ⅱ-325	Unknown variety
169-1	0-187	Unknown variety
170-2	8-47	Unknown variety
17-1	0-1339	Unknown variety
172-2	Ⅱ-102	Unknown variety
174-2	Ⅵ-433	Unknown variety
17-5	0-1339	Unknown variety
176-1	10-73	Unknown variety
176-2	10-73	Unknown variety
176-3	10-73	Unknown variety
176-5	10-73	Unknown variety
177-2	3-1	Unknown variety
177-4	3-1	Unknown variety
177-5	3-1	Unknown variety
179-1	0-1339	Unknown variety
179-2	0-1339	Unknown variety
179-4	0-1339	Unknown variety
180-3	0-510	Unknown variety
180-5	0-510	Unknown variety
181-1	11-6	Unknown variety
181-2	11-6	Unknown variety
181-4	11-6	Unknown variety
182-2	8-49	Unknown variety
185-1	CK4	Unknown variety
185-3	CK4	Unknown variety
185-5	CK4	Unknown variety
186-2	Ⅱ-90	Unknown variety
187-1	8-126	Unknown variety
187-2	8-126	Unknown variety
187-3	8-126	Unknown variety
189-1	0-373	Unknown variety
189-2	0-373	Unknown variety
19-1	0-373	Unknown variety
19-2	0-373	Unknown variety
192-1	8-131	Unknown variety
192-4	8-131	Unknown variety
192-5	8-131	Unknown variety
193-1	Ⅱ-101	Unknown variety
19-4	0-373	Unknown variety
194-2	0-636	Unknown variety
194-3	0-636	Unknown variety
195-2	0-53	Unknown variety
196-2	CK1	Unknown variety
20-1	0-636	Unknown variety
20-4	0-636	Unknown variety
2-3	11-6	Unknown variety
23-1	0-510	Unknown variety
23-3	0-510	Unknown variety
2-5	11-6	Unknown variety
25-1	Ⅱ-101	Unknown variety
25-2	Ⅱ-101	Unknown variety
26-2	3-1	Unknown variety
26-5	3-1	Unknown variety
27-5	Ⅱ-296	Unknown variety
31-3	7-258	Unknown variety
32-4	Ⅵ-433	Unknown variety
3-4	CK2	Unknown variety
34-4	8-126	Unknown variety
34-5	8-126	Unknown variety
34-6	8-126	Unknown variety
35-3	10-105	Unknown variety
3-6	CK2	Unknown variety
36-1	Ⅱ-325	Unknown variety
36-2	Ⅱ-325	Unknown variety
37-4	0-510	Unknown variety
38-1	0-1339	Unknown variety
38-2	0-1339	Unknown variety
38-3	0-1339	Unknown variety
39-2	0-636	Unknown variety
39-5	0-636	Unknown variety
4-2	8-126	Unknown variety
42-2	0-373	Unknown variety
4-4	8-126	Unknown variety
4-5	8-126	Unknown variety
45-2	Ⅱ-102	Unknown variety
51-1	CK3	Unknown variety
51-2	CK3	Unknown variety
51-3	CK3	Unknown variety
51-5	CK3	Unknown variety
5-2	CK4	Unknown variety
52-6	11-6	Unknown variety
5-3	CK4	Unknown variety
53-1	10-73	Unknown variety
5-5	CK4	Unknown variety
55-1	0-53	Unknown variety
67-2	10-105	Unknown variety
69-6	8-126	Unknown variety
70-4	10-73	Unknown variety
72-6	Ⅱ-102	Unknown variety
7-3	10-105	Unknown variety
73-3	Ⅱ-325	Unknown variety
73-5	Ⅱ-325	Unknown variety
7-5	10-105	Unknown variety
78-5	Ⅱ-101	Unknown variety
78-6	Ⅱ-101	Unknown variety
79-6	0-636	Unknown variety
80-4	11-6	Unknown variety
8-2	8-47	Unknown variety
82-4	0-510	Unknown variety
83-4	7-258	Unknown variety
83-5	7-258	Unknown variety
84-4	11-26	Unknown variety
84-6	11-26	Unknown variety
85-2	0-1339	Unknown variety
85-5	0-1339	Unknown variety
85-6	0-1339	Unknown variety
86-3	CK3	Unknown variety
86-6	CK3	Unknown variety
87-2	CK4	Unknown variety
87-5	CK4	Unknown variety
87-6	CK4	Unknown variety
89-2	8-131	Unknown variety
89-3	8-131	Unknown variety
89-5	8-131	Unknown variety
93-2	8-47	Unknown variety
94-1	3-1	Unknown variety
94-4	3-1	Unknown variety
95-1	0-373	Unknown variety
95-5	0-373	Unknown variety

## Sheet: Supplementary Table 3
Basic Imforation of 50 SNPs
CHROM	POS	ID	REF	ALT
F01_transcript_45161	1533	F01_transcript_45161#1533	T	C
F01_transcript_545	5726	F01_transcript_545#5726	G	A
super3470	688070	super3470#688070	T	G
super4166	74945	super4166#74945	A	G
scaffold6848	41278	scaffold6848#41278	T	C
scaffold8363	26504	scaffold8363#26504	C	A
scaffold16466	33511	scaffold16466#33511	G	A
scaffold21722	231096	scaffold21722#231096	G	C
scaffold27127	43820	scaffold27127#43820	T	C
scaffold32396	217544	scaffold32396#217544	A	G
scaffold33397	129090	scaffold33397#129090	C	A
scaffold44729	249648	scaffold44729#249648	A	T
scaffold45530	26802	scaffold45530#26802	G	A
scaffold45694	53664	scaffold45694#53664	T	A
scaffold47878	160739	scaffold47878#160739	G	A
scaffold56308	86716	scaffold56308#86716	C	T
scaffold56766	114410	scaffold56766#114410	G	A
scaffold63255	9386	scaffold63255#9386	T	A
scaffold67320	63734	scaffold67320#63734	A	T
scaffold75595	72522	scaffold75595#72522	G	A
scaffold76430	156732	scaffold76430#156732	T	G
scaffold84982	13037	scaffold84982#13037	C	A
scaffold86602	44200	scaffold86602#44200	A	C
scaffold91090	128036	scaffold91090#128036	T	G
scaffold91492	52598	scaffold91492#52598	G	T
scaffold92027	42484	scaffold92027#42484	G	A
scaffold98855	79301	scaffold98855#79301	A	C
scaffold99794	30512	scaffold99794#30512	T	C
scaffold109798	24517	scaffold109798#24517	T	C
scaffold114571	152184	scaffold114571#152184	A	G
scaffold125489	54680	scaffold125489#54680	C	A
scaffold138859	166750	scaffold138859#166750	G	C
scaffold147212	126398	scaffold147212#126398	T	C
scaffold147406	491745	scaffold147406#491745	C	A
scaffold155097	18038	scaffold155097#18038	C	T
scaffold155968	76526	scaffold155968#76526	T	C
scaffold168967	160672	scaffold168967#160672	A	G
scaffold174230	23636	scaffold174230#23636	G	A
scaffold175032	25777	scaffold175032#25777	T	C
scaffold175106	61930	scaffold175106#61930	G	A
scaffold196624	91743	scaffold196624#91743	A	G
scaffold214027	195643	scaffold214027#195643	C	G
scaffold222694	36670	scaffold222694#36670	T	G
scaffold230373	58516	scaffold230373#58516	G	A
C5057115	15929	C5057115#15929	G	A
C5133085	89181	C5133085#89181	T	C
Gene.7436	113	Gene.7436#113	C	G

## Sheet: Supplementary Table 4
Sample ID	Actual	Predicted
105-3	Improved variety	Improved variety
108-4	Improved variety	Improved variety
111-3	Improved variety	Improved variety
117-1	Improved variety	Improved variety
117-2	Improved variety	Improved variety
117-3	Improved variety	Unimoprved variety
117-4	Improved variety	Improved variety
117-6	Improved variety	Improved variety
12-1	Improved variety	Improved variety
121-2	Improved variety	Improved variety
121-5	Improved variety	Unimoprved variety
123-3	Improved variety	Improved variety
123-4	Improved variety	Improved variety
126-2	Improved variety	Unimproved variety
126-3	Improved variety	Improved variety
126-5	Improved variety	Improved variety
126-6	Improved variety	Improved variety
133-1	Improved variety	Improved variety
133-4	Improved variety	Improved variety
133-5	Improved variety	Improved variety
133-6	Improved variety	Improved variety
137-1	Improved variety	Improved variety
137-3	Improved variety	Improved variety
137-5	Improved variety	Improved variety
138-3	Improved variety	Improved variety
138-5	Improved variety	Improved variety
138-6	Improved variety	Improved variety
140-1	Improved variety	Improved variety
140-2	Improved variety	Improved variety
140-3	Improved variety	Improved variety
140-6	Improved variety	Improved variety
14-1	Improved variety	Improved variety
144-1	Improved variety	Improved variety
144-2	Improved variety	Improved variety
144-4	Improved variety	Improved variety
144-5	Improved variety	Improved variety
144-6	Improved variety	Improved variety
149-1	Improved variety	Improved variety
149-3	Improved variety	Improved variety
149-4	Improved variety	Improved variety
149-5	Improved variety	Improved variety
149-6	Improved variety	Improved variety
156-1	Improved variety	Improved variety
156-5	Improved variety	Improved variety
156-6	Improved variety	Improved variety
171-1	Improved variety	Improved variety
171-3	Improved variety	Improved variety
173-3	Improved variety	Improved variety
175-1	Improved variety	Improved variety
175-3	Improved variety	Improved variety
175-4	Improved variety	Improved variety
178-1	Improved variety	Improved variety
178-3	Improved variety	Improved variety
178-6	Improved variety	Improved variety
18-1	Improved variety	Improved variety
184-1	Improved variety	Improved variety
184-2	Improved variety	Improved variety
184-6	Improved variety	Improved variety
188-4	Improved variety	Improved variety
190-3	Improved variety	Improved variety
190-4	Improved variety	Improved variety
30-3	Improved variety	Improved variety
40-3	Improved variety	Improved variety
40-6	Improved variety	Improved variety
41-3	Improved variety	Improved variety
47-1	Improved variety	Improved variety
49-2	Improved variety	Improved variety
6-2	Improved variety	Improved variety
6-4	Improved variety	Improved variety
6-6	Improved variety	Improved variety
71-5	Improved variety	Improved variety
74-1	Improved variety	Improved variety
74-2	Improved variety	Improved variety
81-6	Improved variety	Improved variety
95-1	Improved variety	Improved variety
95-5	Improved variety	Improved variety
96-2	Improved variety	Improved variety
96-3	Improved variety	Improved variety
96-4	Improved variety	Improved variety
100-1	Unimoprved variety	Unimoprved variety
100-2	Unimoprved variety	Unimoprved variety
100-3	Unimoprved variety	Unimoprved variety
100-4	Unimoprved variety	Unimoprved variety
100-5	Unimoprved variety	Unimoprved variety
100-6	Unimoprved variety	Unimoprved variety
10-1	Unimoprved variety	Unimoprved variety
101-1	Unimoprved variety	Unimoprved variety
101-2	Unimoprved variety	Unimoprved variety
101-4	Unimoprved variety	Unimoprved variety
101-6	Unimoprved variety	Unimoprved variety
102-5	Unimoprved variety	Unimoprved variety
102-6	Unimoprved variety	Unimoprved variety
103-1	Unimoprved variety	Unimoprved variety
103-2	Unimoprved variety	Unimoprved variety
103-3	Unimoprved variety	Unimoprved variety
104-1	Unimoprved variety	Unimoprved variety
104-2	Unimoprved variety	Unimoprved variety
104-4	Unimoprved variety	Unimoprved variety
104-5	Unimoprved variety	Unimoprved variety
104-6	Unimoprved variety	Unimoprved variety
107-1	Unimoprved variety	Unimoprved variety
109-4	Unimoprved variety	Unimoprved variety
109-5	Unimoprved variety	Unimoprved variety
1-1	Unimoprved variety	Unimoprved variety
11-2	Unimoprved variety	Unimoprved variety
112-5	Unimoprved variety	Unimoprved variety
113-3	Unimoprved variety	Unimoprved variety
113-5	Unimoprved variety	Unimoprved variety
113-6	Unimoprved variety	Unimoprved variety
114-2	Unimoprved variety	Unimoprved variety
115-1	Unimoprved variety	Unimoprved variety
115-3	Unimoprved variety	Unimoprved variety
115-4	Unimoprved variety	Unimoprved variety
115-5	Unimoprved variety	Unimoprved variety
116-5	Unimoprved variety	Unimoprved variety
118-1	Unimoprved variety	Unimoprved variety
118-3	Unimoprved variety	Unimoprved variety
118-5	Unimoprved variety	Unimoprved variety
118-6	Unimoprved variety	Unimoprved variety
119-2	Unimoprved variety	Unimoprved variety
119-3	Unimoprved variety	Unimoprved variety
1-2	Unimoprved variety	Unimoprved variety
120-4	Unimoprved variety	Unimoprved variety
120-6	Unimoprved variety	Unimoprved variety
122-1	Unimoprved variety	Unimoprved variety
122-2	Unimoprved variety	Unimoprved variety
122-3	Unimoprved variety	Unimoprved variety
122-5	Unimoprved variety	Unimoprved variety
122-6	Unimoprved variety	Unimoprved variety
124-3	Unimoprved variety	Unimoprved variety
124-5	Unimoprved variety	Unimoprved variety
127-1	Unimoprved variety	Unimoprved variety
127-4	Unimoprved variety	Unimoprved variety
128-6	Unimoprved variety	Unimoprved variety
129-1	Unimoprved variety	Unimoprved variety
129-5	Unimoprved variety	Unimoprved variety
129-6	Unimoprved variety	Unimoprved variety
1-3	Unimoprved variety	Unimoprved variety
130-2	Unimoprved variety	Unimoprved variety
130-3	Unimoprved variety	Unimoprved variety
130-5	Unimoprved variety	Unimoprved variety
131-5	Unimoprved variety	Unimoprved variety
13-2	Unimoprved variety	Unimoprved variety
134-1	Unimoprved variety	Unimoprved variety
134-2	Unimoprved variety	Unimoprved variety
134-3	Unimoprved variety	Unimoprved variety
134-5	Unimoprved variety	Unimoprved variety
135-1	Unimoprved variety	Unimoprved variety
135-2	Unimoprved variety	Unimoprved variety
135-4	Unimoprved variety	Unimoprved variety
135-6	Unimoprved variety	Unimoprved variety
136-1	Unimoprved variety	Unimoprved variety
136-3	Unimoprved variety	Unimoprved variety
136-5	Unimoprved variety	Unimoprved variety
136-6	Unimoprved variety	Unimoprved variety
139-5	Unimoprved variety	Unimoprved variety
1-4	Unimoprved variety	Unimoprved variety
141-2	Unimoprved variety	Unimoprved variety
141-6	Unimoprved variety	Unimoprved variety
142-1	Unimoprved variety	Unimoprved variety
142-3	Unimoprved variety	Unimoprved variety
142-5	Unimoprved variety	Unimoprved variety
142-6	Unimoprved variety	Unimoprved variety
143-1	Unimoprved variety	Unimoprved variety
143-2	Unimoprved variety	Unimoprved variety
143-3	Unimoprved variety	Unimoprved variety
143-5	Unimoprved variety	Unimoprved variety
143-6	Unimoprved variety	Unimoprved variety
145-1	Unimoprved variety	Unimoprved variety
145-2	Unimoprved variety	Unimoprved variety
145-3	Unimoprved variety	Unimoprved variety
145-5	Unimoprved variety	Unimoprved variety
145-6	Unimoprved variety	Unimoprved variety
146-1	Unimoprved variety	Unimoprved variety
146-4	Unimoprved variety	Unimoprved variety
146-5	Unimoprved variety	Unimoprved variety
146-6	Unimoprved variety	Unimoprved variety
147-3	Unimoprved variety	Unimoprved variety
147-4	Unimoprved variety	Unimoprved variety
147-5	Unimoprved variety	Unimoprved variety
147-6	Unimoprved variety	Unimoprved variety
148-1	Unimoprved variety	Unimoprved variety
148-2	Unimoprved variety	Unimoprved variety
148-3	Unimoprved variety	Unimoprved variety
148-4	Unimoprved variety	Unimoprved variety
148-5	Unimoprved variety	Unimoprved variety
1-5	Unimoprved variety	Unimoprved variety
150-1	Unimoprved variety	Unimoprved variety
150-2	Unimoprved variety	Unimoprved variety
150-4	Unimoprved variety	Unimoprved variety
151-1	Unimoprved variety	Unimoprved variety
151-3	Unimoprved variety	Unimoprved variety
151-5	Unimoprved variety	Unimoprved variety
152-1	Unimoprved variety	Unimoprved variety
152-2	Unimoprved variety	Unimoprved variety
152-3	Unimoprved variety	Unimoprved variety
152-4	Unimoprved variety	Unimoprved variety
152-5	Unimoprved variety	Unimoprved variety
152-6	Unimoprved variety	Unimoprved variety
153-1	Unimoprved variety	Unimoprved variety
153-2	Unimoprved variety	Unimoprved variety
153-3	Unimoprved variety	Unimoprved variety
153-5	Unimoprved variety	Unimoprved variety
153-6	Unimoprved variety	Unimoprved variety
154-1	Unimoprved variety	Imoprved variety
154-2	Unimoprved variety	Unimoprved variety
154-6	Unimoprved variety	Unimoprved variety
155-3	Unimoprved variety	Unimoprved variety
155-6	Unimoprved variety	Unimoprved variety
157-5	Unimoprved variety	Unimoprved variety
157-6	Unimoprved variety	Unimoprved variety
158-1	Unimoprved variety	Unimoprved variety
158-2	Unimoprved variety	Unimoprved variety
158-4	Unimoprved variety	Unimoprved variety
159-1	Unimoprved variety	Unimoprved variety
159-2	Unimoprved variety	Unimoprved variety
159-3	Unimoprved variety	Unimoprved variety
159-4	Unimoprved variety	Unimoprved variety
159-5	Unimoprved variety	Unimoprved variety
1-6	Unimoprved variety	Unimoprved variety
160-1	Unimoprved variety	Unimoprved variety
160-2	Unimoprved variety	Unimoprved variety
160-3	Unimoprved variety	Unimoprved variety
160-4	Unimoprved variety	Unimoprved variety
160-5	Unimoprved variety	Unimoprved variety
160-6	Unimoprved variety	Unimoprved variety
16-1	Unimoprved variety	Unimoprved variety
161-3	Unimoprved variety	Unimoprved variety
161-5	Unimoprved variety	Unimoprved variety
162-1	Unimoprved variety	Unimoprved variety
162-2	Unimoprved variety	Unimoprved variety
162-3	Unimoprved variety	Unimoprved variety
162-4	Unimoprved variety	Unimoprved variety
162-5	Unimoprved variety	Unimoprved variety
162-6	Unimoprved variety	Unimoprved variety
16-3	Unimoprved variety	Imoprved variety
163-2	Unimoprved variety	Unimoprved variety
163-3	Unimoprved variety	Unimoprved variety
163-6	Unimoprved variety	Unimoprved variety
164-1	Unimoprved variety	Unimoprved variety
164-2	Unimoprved variety	Unimoprved variety
164-3	Unimoprved variety	Unimoprved variety
164-4	Unimoprved variety	Unimoprved variety
164-5	Unimoprved variety	Unimoprved variety
164-6	Unimoprved variety	Unimoprved variety
165-1	Unimoprved variety	Unimoprved variety
165-2	Unimoprved variety	Unimoprved variety
165-3	Unimoprved variety	Unimoprved variety
165-4	Unimoprved variety	Unimoprved variety
165-5	Unimoprved variety	Unimoprved variety
165-6	Unimoprved variety	Unimoprved variety
166-2	Unimoprved variety	Unimoprved variety
168-2	Unimoprved variety	Unimoprved variety
168-3	Unimoprved variety	Unimoprved variety
169-1	Unimoprved variety	Unimoprved variety
170-2	Unimoprved variety	Unimoprved variety
17-1	Unimoprved variety	Unimoprved variety
172-2	Unimoprved variety	Unimoprved variety
174-2	Unimoprved variety	Unimoprved variety
17-5	Unimoprved variety	Unimoprved variety
176-1	Unimoprved variety	Unimoprved variety
176-2	Unimoprved variety	Unimoprved variety
176-3	Unimoprved variety	Unimoprved variety
176-5	Unimoprved variety	Unimoprved variety
177-2	Unimoprved variety	Unimoprved variety
177-4	Unimoprved variety	Unimoprved variety
177-5	Unimoprved variety	Unimoprved variety
179-1	Unimoprved variety	Unimoprved variety
179-2	Unimoprved variety	Unimoprved variety
179-4	Unimoprved variety	Unimoprved variety
180-3	Unimoprved variety	Unimoprved variety
180-5	Unimoprved variety	Unimoprved variety
181-1	Unimoprved variety	Unimoprved variety
181-2	Unimoprved variety	Unimoprved variety
181-4	Unimoprved variety	Unimoprved variety
182-2	Unimoprved variety	Unimoprved variety
185-1	Unimoprved variety	Unimoprved variety
185-3	Unimoprved variety	Unimoprved variety
185-5	Unimoprved variety	Unimoprved variety
186-2	Unimoprved variety	Unimoprved variety
187-1	Unimoprved variety	Unimoprved variety
187-2	Unimoprved variety	Unimoprved variety
187-3	Unimoprved variety	Unimoprved variety
189-1	Unimoprved variety	Unimoprved variety
189-2	Unimoprved variety	Unimoprved variety
19-1	Unimoprved variety	Unimoprved variety
19-2	Unimoprved variety	Unimoprved variety
192-1	Unimoprved variety	Unimoprved variety
192-4	Unimoprved variety	Unimoprved variety
192-5	Unimoprved variety	Unimoprved variety
193-1	Unimoprved variety	Unimoprved variety
19-4	Unimoprved variety	Unimoprved variety
194-2	Unimoprved variety	Unimoprved variety
194-3	Unimoprved variety	Unimoprved variety
195-2	Unimoprved variety	Unimoprved variety
196-2	Unimoprved variety	Unimoprved variety
20-1	Unimoprved variety	Unimoprved variety
20-4	Unimoprved variety	Unimoprved variety
2-3	Unimoprved variety	Unimoprved variety
23-1	Unimoprved variety	Unimoprved variety
23-3	Unimoprved variety	Unimoprved variety
2-5	Unimoprved variety	Unimoprved variety
25-1	Unimoprved variety	Unimoprved variety
25-2	Unimoprved variety	Unimoprved variety
26-2	Unimoprved variety	Unimoprved variety
26-5	Unimoprved variety	Unimoprved variety
27-5	Unimoprved variety	Unimoprved variety
31-3	Unimoprved variety	Unimoprved variety
32-4	Unimoprved variety	Unimoprved variety
3-4	Unimoprved variety	Unimoprved variety
34-4	Unimoprved variety	Unimoprved variety
34-5	Unimoprved variety	Unimoprved variety
34-6	Unimoprved variety	Unimoprved variety
35-3	Unimoprved variety	Unimoprved variety
3-6	Unimoprved variety	Unimoprved variety
36-1	Unimoprved variety	Unimoprved variety
36-2	Unimoprved variety	Unimoprved variety
37-4	Unimoprved variety	Unimoprved variety
38-1	Unimoprved variety	Unimoprved variety
38-2	Unimoprved variety	Unimoprved variety
38-3	Unimoprved variety	Unimoprved variety
39-2	Unimoprved variety	Unimoprved variety
39-5	Unimoprved variety	Unimoprved variety
4-2	Unimoprved variety	Unimoprved variety
42-2	Unimoprved variety	Unimoprved variety
4-4	Unimoprved variety	Unimoprved variety
4-5	Unimoprved variety	Unimoprved variety
45-2	Unimoprved variety	Unimoprved variety
51-1	Unimoprved variety	Unimoprved variety
51-2	Unimoprved variety	Unimoprved variety
51-3	Unimoprved variety	Unimoprved variety
51-5	Unimoprved variety	Unimoprved variety
5-2	Unimoprved variety	Unimoprved variety
52-6	Unimoprved variety	Unimoprved variety
5-3	Unimoprved variety	Unimoprved variety
53-1	Unimoprved variety	Unimoprved variety
5-5	Unimoprved variety	Unimoprved variety
55-1	Unimoprved variety	Unimoprved variety
67-2	Unimoprved variety	Unimoprved variety
69-6	Unimoprved variety	Unimoprved variety
70-4	Unimoprved variety	Unimoprved variety
72-6	Unimoprved variety	Unimoprved variety
7-3	Unimoprved variety	Unimoprved variety
73-3	Unimoprved variety	Unimoprved variety
73-5	Unimoprved variety	Unimoprved variety
7-5	Unimoprved variety	Unimoprved variety
78-5	Unimoprved variety	Unimoprved variety
78-6	Unimoprved variety	Unimoprved variety
79-6	Unimoprved variety	Unimoprved variety
80-4	Unimoprved variety	Unimoprved variety
8-2	Unimoprved variety	Unimoprved variety
82-4	Unimoprved variety	Unimoprved variety
83-4	Unimoprved variety	Unimoprved variety
83-5	Unimoprved variety	Unimoprved variety
84-4	Unimoprved variety	Unimoprved variety
84-6	Unimoprved variety	Unimoprved variety
85-2	Unimoprved variety	Unimoprved variety
85-5	Unimoprved variety	Unimoprved variety
85-6	Unimoprved variety	Unimoprved variety
86-3	Unimoprved variety	Unimoprved variety
86-6	Unimoprved variety	Unimoprved variety
87-2	Unimoprved variety	Unimoprved variety
87-5	Unimoprved variety	Unimoprved variety
87-6	Unimoprved variety	Unimoprved variety
89-2	Unimoprved variety	Unimoprved variety
89-3	Unimoprved variety	Unimoprved variety
89-5	Unimoprved variety	Unimoprved variety
91-2	Unimoprved variety	Unimoprved variety
93-2	Unimoprved variety	Unimoprved variety
94-1	Unimoprved variety	Unimoprved variety
94-4	Unimoprved variety	Unimoprved variety

## Sheet: Supplementary Figure.3
Supplementary Figure.2 DNA fingerprinting of 78 individuals in validation population improved slash pine varieties. Each line represents one improved slash pine varieties, and each column represents one SNP locus. Blue, yellow and orange represent 0/0, 0/1, and 1/1, respectively.
